# Supplementary material for: Genetic Correlation, Pleiotropy, and Molar Morphology in a Longitudinal Sample of Australian Twins and Families
Source: MDPI journal article supplement (doi:10.3390/genes13060996), 2022-06-02
Supplement: s1 [file s1]

Table S1. Variance components inter-trait correlations: deciduous morphology.

| Trait <sup>a</sup>               | N/Cov <sup>b</sup> | Genetic       |                 |                   | Environmental |                 | Phenotypic |
|----------------------------------|--------------------|---------------|-----------------|-------------------|---------------|-----------------|------------|
|                                  |                    | $\rho_G^c$    | $P(\rho_G=0)^d$ | $P( \rho_G =1)^d$ | $\rho_E^c$    | $P(\rho_E=0)^d$ | $\rho_P^f$ |
| m <sup>1</sup> meta <sup>e</sup> |                    |               |                 |                   |               |                 |            |
| m <sup>2</sup> meta              | 280/s              | 0.080±0.122   | 0.515           | <0.001            | -0.072±0.139  | 0.605           | 0.031      |
| m <sup>1</sup> hypo              | 252                | 0.384±0.133*  | 0.005           | <0.001            | -0.113±0.123  | 0.262           | 0.186      |
| m <sup>2</sup> hypo              | 281                | 0.041±0.116   | 0.726           | <0.001            | 0.027±0.142   | 0.851           | 0.037      |
| m <sup>2</sup> c5                | 278/s              | -0.030±0.141  | 0.832           | <0.001            | -0.027±0.138  | 0.842           | -0.029     |
| m <sup>2</sup> ctrait            | 279                | 0.056±0.106   | 0.594           | <0.001            | -0.204±0.136  | 0.148           | <0.001     |
| m <sup>2</sup> para              | 281                | -0.036±0.125  | 0.777           | <0.001            | -0.150±0.132  | 0.267           | -0.074     |
| m <sub>2</sub> afov              | 276                | 0.315±0.161   | 0.060           | 0.001             | -0.092±0.134  | 0.496           | 0.129      |
| m <sub>1</sub> cno               | 261/s              | 0.033±0.124   | 0.788           | <0.001            | -0.068±0.133  | 0.609           | 0.001      |
| m <sub>2</sub> dwrink            | 274                | -0.001±0.118  | 0.996           | <0.001            | 0.051±0.138   | 0.714           | 0.013      |
| m <sub>1</sub> c5                | 260/s              | 0.116±0.117   | 0.326           | <0.001            | -0.029±0.131  | 0.822           | 0.071      |
| m <sub>2</sub> c5                | 284/a, a*s         | -0.047±0.201  | 0.814           | 0.009             | 0.081±0.133   | 0.545           | 0.019      |
| m <sub>2</sub> c7                | 284                | -0.106±0.111  | 0.339           | <0.001            | 0.021±0.134   | 0.874           | -0.072     |
| m <sub>2</sub> dtcrest           | 276                | 0.224±0.113   | 0.055           | <0.001            | 0.009±0.139   | 0.949           | 0.156      |
| m <sup>2</sup> meta              |                    |               |                 |                   |               |                 |            |
| m <sup>1</sup> hypo              | 280/s              | 0.136±0.140   | 0.324           | <0.001            | -0.007±0.126  | 0.579           | 0.053      |
| m <sup>2</sup> hypo              | 279/s              | 0.134±0.108   | 0.218           | <0.001            | -0.059±0.121  | 0.628           | 0.075      |
| m <sup>2</sup> c5                | 279/s              | -0.287±0.139* | 0.045           | <0.001            | -0.050±0.133  | 0.708           | -0.190     |
| m <sup>2</sup> ctrait            | 279/s              | 0.064±0.101   | 0.527           | <0.001            | -0.241±0.126  | 0.069           | -0.004     |
| m <sup>2</sup> para              | 281/s              | -0.046±0.118  | 0.699           | <0.001            | 0.087±0.121   | 0.475           | 0.001      |
| m <sub>2</sub> afov              | 285/a, s           | 0.193±0.175   | 0.268           | <0.001            | -0.096±0.137  | 0.486           | 0.055      |
| m <sub>1</sub> cno               | 281/s              | 0.061±0.129   | 0.641           | <0.001            | 0.195±0.134   | 0.156           | 0.106      |
| m <sub>2</sub> dwrink            | 284/s              | -0.041±0.121  | 0.732           | <0.001            | 0.156±0.143   | 0.285           | 0.014      |
| m <sub>1</sub> c5                | 281/a, s           | 0.114±0.121   | 0.350           | <0.001            | 0.060±0.132   | 0.649           | 0.096      |
| m <sub>2</sub> c5                | 286/all            | 0.359±0.203   | 0.066           | 0.021             | -0.052±0.125  | 0.676           | 0.127      |
| m <sub>2</sub> c7                | 286/s              | -0.124±0.106  | 0.245           | <0.001            | 0.059±0.124   | 0.636           | -0.073     |
| m <sub>2</sub> dtcrest           | 285/s              | 0.010±0.123   | 0.935           | <0.001            | -0.062±0.141  | 0.662           | -0.014     |

|                       |            |               |        |        |              |       |        |
|-----------------------|------------|---------------|--------|--------|--------------|-------|--------|
| m <sup>1</sup> hypo   |            |               |        |        |              |       |        |
| m <sup>2</sup> hypo   | 281        | 0.490±0.123*  | <0.001 | <0.001 | -0.075±0.126 | 0.556 | 0.272  |
| m <sup>2</sup> c5     | 279/s      | 0.019±0.159   | 0.904  | <0.001 | 0.161±0.127  | 0.213 | 0.084  |
| m <sup>2</sup> ctrait | 280        | 0.346±0.111*  | 0.004  | <0.042 | 0.127±0.134  | 0.347 | 0.267  |
| m <sup>2</sup> para   | 281        | -0.063±0.144  | 0.663  | <0.001 | 0.160±0.125  | 0.210 | 0.030  |
| m2 afov               | 276/a      | 0.011±0.191   | 0.956  | <0.001 | -0.064±0.129 | 0.619 | -0.029 |
| m1 cno                | 262/s      | 0.321±0.149*  | 0.031  | <0.001 | -0.140±0.124 | 0.268 | 0.135  |
| m2 dwrink             | 275        | 0.324±0.126*  | 0.013  | <0.001 | -0.086±0.134 | 0.522 | 0.181  |
| m1 c5                 | 261/s      | 0.459±0.127*  | 0.001  | <0.001 | -0.135±0.121 | 0.272 | 0.231  |
| m2 c5                 | 284/a, a*s | -0.108±0.219  | 0.621  | 0.008  | 0.028±0.124  | 0.823 | -0.026 |
| m2 c7                 | 284        | 0.147±0.123   | 0.240  | <0.001 | 0.031±0.127  | 0.807 | 0.105  |
| m2 dtcrest            | 277        | 0.309±0.134*  | 0.020  | <0.001 | -0.186±0.130 | 0.165 | 0.109  |
| m <sup>2</sup> hypo   |            |               |        |        |              |       |        |
| m <sup>2</sup> c5     | 279/s      | 0.380±0.116*  | 0.002  | <0.001 | -0.249±0.121 | 0.053 | 0.165  |
| m <sup>2</sup> ctrait | 280        | 0.306±0.092*  | 0.001  | <0.065 | -0.108±0.129 | 0.407 | 0.219  |
| m <sup>2</sup> para   | 281        | 0.278±0.108*  | 0.012  | <0.001 | -0.097±0.120 | 0.425 | 0.155  |
| m2 afov               | 286/a      | -0.323±0.157* | 0.033  | 0.001  | 0.328±0.121  | 0.014 | -0.044 |
| m1 cno                | 282/s      | 0.258±0.137   | 0.055  | <0.001 | -0.220±0.139 | 0.129 | 0.104  |
| m2 dwrink             | 285        | 0.158±0.108   | 0.145  | <0.001 | -0.029±0.141 | 0.837 | 0.111  |
| m1 c5                 | 282/s      | 0.288±0.117*  | 0.017  | <0.001 | -0.001±0.139 | 0.992 | 0.200  |
| m2 c5                 | 287/a, a*s | 0.344±0.174*  | 0.050  | 0.009  | -0.062±0.130 | 0.639 | 0.132  |
| m2 c7                 | 287        | 0.159±0.100   | 0.115  | <0.001 | -0.120±0.124 | 0.341 | 0.090  |
| m2 dtcrest            | 286        | -0.023±0.112  | 0.838  | <0.001 | -0.027±0.132 | 0.839 | -0.024 |
| m <sup>2</sup> c5     |            |               |        |        |              |       |        |
| m <sup>2</sup> ctrait | 279/s      | 0.251±0.133*  | 0.050  | <0.001 | -0.111±0.150 | 0.449 | 0.137  |
| m <sup>2</sup> para   | 281/s      | 0.118±0.148   | 0.422  | <0.001 | 0.080±0.126  | 0.524 | 0.102  |
| m2 afov               | 285/a, s   | 0.326±0.207   | 0.116  | 0.003  | -0.146±0.139 | 0.304 | 0.075  |
| m1 cno                | 277/s      | -0.033±0.149  | 0.827  | <0.001 | 0.095±0.142  | 0.508 | 0.017  |
| m2 dwrink             | 283/s      | 0.129±0.142   | 0.368  | <0.001 | 0.241±0.163  | 0.154 | 0.160  |
| m1 c5                 | 277/s      | -0.021±0.138  | 0.878  | <0.001 | 0.097±0.134  | 0.475 | 0.024  |
| m2 c5                 | 287/all    | 0.056±0.232   | 0.808  | 0.006  | 0.003±0.130  | 0.980 | 0.024  |

|                       |             |               |        |        |              |        |        |
|-----------------------|-------------|---------------|--------|--------|--------------|--------|--------|
| m2 c7                 | 287/s       | 0.054±0.128   | 0.678  | <0.001 | 0.068±0.135  | 0.616  | 0.057  |
| m2 dtcrest            | 285/s       | 0.162±0.139   | 0.249  | <0.001 | 0.020±0.166  | 0.903  | 0.106  |
| m <sup>2</sup> ctrait |             |               |        |        |              |        |        |
| m <sup>2</sup> para   | 281         | 0.378±0.107*  | 0.001  | <0.001 | -0.202±0.122 | 0.111  | 0.221  |
| m2 afov               | 285/a       | -0.060±0.144  | 0.675  | <0.001 | -0.001±0.145 | 0.997  | -0.035 |
| m1 cno                | 279/s       | -0.060±0.114  | 0.599  | <0.001 | 0.166±0.141  | 0.248  | -0.008 |
| m2 dwrink             | 284         | -0.016±0.100  | 0.870  | <0.001 | -0.074±0.149 | 0.620  | -0.027 |
| m1 c5                 | 279/s       | 0.072±0.105   | 0.497  | <0.001 | 0.101±0.134  | 0.454  | 0.077  |
| m2 c5                 | 286/a, a*s  | -0.099±0.170  | 0.556  | 0.007  | 0.057±0.150  | 0.706  | -0.031 |
| m2 c7                 | 286         | 0.075±0.093   | 0.421  | <0.001 | 0.196±0.132  | 0.153  | 0.096  |
| m2 dtcrest            | 285         | -0.020±0.104  | 0.849  | <0.001 | 0.232±0.153  | 0.149  | 0.034  |
| m <sup>2</sup> para   |             |               |        |        |              |        |        |
| m2 afov               | 286/a       | 0.005±0.171   | 0.976  | <0.001 | 0.127±0.123  | 0.313  | 0.064  |
| m1 cno                | 282/s       | -0.109±0.132  | 0.415  | <0.001 | 0.126±0.133  | 0.351  | -0.028 |
| m2 dwrink             | 286         | 0.348±0.112*  | 0.003  | <0.001 | -0.203±0.124 | 0.115  | 0.183  |
| m1 c5                 | 283/s       | -0.025±0.127  | 0.847  | <0.001 | 0.050±0.130  | 0.699  | 0.001  |
| m2 c5                 | 288/a, a*s  | -0.012±0.198  | 0.952  | 0.005  | 0.064±0.126  | 0.612  | 0.028  |
| m2 c7                 | 287         | 0.181±0.109   | 0.099  | <0.001 | 0.013±0.122  | 0.912  | 0.129  |
| m2 dtcrest            | 287         | 0.031±0.116   | 0.791  | <0.001 | -0.105±0.124 | 0.402  | -0.016 |
| m2 afov               |             |               |        |        |              |        |        |
| m1 cno                | 276/a, s    | 0.099±0.183   | 0.591  | <0.001 | -0.075±0.156 | 0.633  | 0.018  |
| m2 dwrink             | 274/a       | 0.082±0.173   | 0.649  | <0.001 | 0.373±0.121  | 0.005  | 0.189  |
| m1 c5                 | 275/a, s    | 0.127±0.169   | 0.455  | <0.001 | -0.048±0.146 | 0.743  | 0.045  |
| m2 c5                 | 284/a, a*s. | 0.110±0.326   | 0.727  | 0.029  | -0.138±0.122 | 0.276  | -0.050 |
| m2 c7                 | 284/a       | 0.030±0.150   | 0.840  | <0.001 | 0.109±0.129  | 0.403  | 0.057  |
| m2 dtcrest            | 277/a       | 0.366±0.161*  | 0.019  | 0.003  | -0.140±0.128 | 0.282  | 0.123  |
| m1 cno                |             |               |        |        |              |        |        |
| m2 dwrink             | 272/s       | 0.244±0.133   | 0.059  | <0.001 | -0.368±0.132 | 0.014  | 0.067  |
| m1 c5                 | 240/s       | 0.940±0.041** | <0.001 | 0.078  | 0.624±0.081  | <0.001 | 0.826  |
| m2 c5                 | 283/all     | -0.167±0.213  | 0.451  | 0.005  | 0.007±0.160  | 0.967  | -0.073 |
| m2 c7                 | 284/s       | 0.058±0.113   | 0.610  | <0.001 | 0.157±0.130  | 0.240  | 0.084  |

|            |            |               |              |                  |              |       |        |
|------------|------------|---------------|--------------|------------------|--------------|-------|--------|
| m2 dtcrest | 271/s      | 0.155±0.119   | 0.206        | <b>&lt;0.003</b> | 0.244±0.138  | 0.091 | 0.184  |
| m2 dwrink  |            |               |              |                  |              |       |        |
| m1 c5      | 271/s      | 0.124±0.124   | 0.308        | <b>&lt;0.001</b> | -0.140±0.143 | 0.335 | 0.051  |
| m2 c5      | 283/a, a*s | -0.001±0.199  | 0.994        | <b>0.006</b>     | -0.039±0.144 | 0.787 | -0.016 |
| m2 c7      | 284        | 0.321±0.099*  | <b>0.002</b> | <b>&lt;0.001</b> | -0.011±0.139 | 0.935 | 0.246  |
| m2 dtcrest | 268        | 0.082±0.115   | 0.472        | <b>&lt;0.001</b> | -0.181±0.131 | 0.178 | 0.010  |
| m1 c5      |            |               |              |                  |              |       |        |
| m2 c5      | 283/all    | 0.090±0.202   | 0.655        | <b>0.006</b>     | 0.001±0.148  | 0.993 | 0.041  |
| m2 c7      | 284/s      | 0.088±0.108   | 0.414        | <b>&lt;0.001</b> | 0.106±0.126  | 0.401 | 0.093  |
| m2 dtcrest | 271/s      | -0.041±0.118  | 0.731        | <b>&lt;0.001</b> | 0.221±0.133  | 0.111 | 0.042  |
| m2 c5      |            |               |              |                  |              |       |        |
| m2 c7      | 285/a, a*s | 0.246±0.169   | 0.141        | <b>0.006</b>     | -0.261±0.127 | 0.055 | 0.019  |
| m2 dtcrest | 283/a, a*s | -0.453±0.174* | <b>0.009</b> | <b>0.016</b>     | 0.150±0.124  | 0.238 | -0.138 |
| m2 c7      |            |               |              |                  |              |       |        |
| m2 dtcrest | 284        | 0.120±0.104   | 0.253        | <b>&lt;0.001</b> | 0.009±0.126  | 0.941 | 0.090  |

<sup>a</sup>m=molar. Maxillary and mandibular traits indicated by superscript and subscript, respectively. All traits represented by their maximum antimeric expression score. For a list of morphological trait abbreviations, see Table 1. “e” superscript indicates a trait that was originally flagged for intra-observer error because the error range exceeded a single grade, but whose mean error does not exceed 0.300. Traits with mean error exceeding 0.300 were omitted from the correlation analyses. All models involving m1/m2 cusp 6 and all but one model involving m2 cusp number either failed to converge or yielded suspect results due to standard deviation ranges for parameter estimates and are excluded from the table. These traits are omitted from Figure 1 and all summary statistics. Results for these models can be found in the supplemental files of Paul (2017).

<sup>b</sup>Covariates fixed in the genetic correlation models based on univariate model results (see Paul et al., 2020). “a”=age; “s”=sex; “a\*s”=age/sex interaction; “all”=all covariates.

<sup>c</sup>Maximum-likelihood estimate of genetic correlation. Cases of incomplete pleiotropy indicated by a single asterisk. Cases of complete pleiotropy indicated by two asterisks. Dashes are associated with incalculable parameter estimates.

<sup>d</sup>Probability of hypothesis (as indicated in parentheses) given pedigree structure with values p<0.050 bolded. Dashes are associated with incalculable parameter estimates.

<sup>e</sup>Maximum-likelihood estimate of environmental correlation. Dashes are associated with incalculable parameter estimates.

<sup>f</sup>Maximum-likelihood estimate of derived phenotypic correlation. Dashes are associated with incalculable parameter estimates.
