# Supplementary material for: Genetic Correlation, Pleiotropy, and Molar Morphology in a Longitudinal Sample of Australian Twins and Families
Source: MDPI journal article supplement (doi:10.3390/genes13060996), 2022-06-02
Supplement: s1 [file s1]

Table S2. Variance components inter-trait correlations: permanent morphology.

| Trait <sup>a</sup>               | N/Cov <sup>b</sup> | Genetic      |                 |                   | Environmental |                 | Phenotypic |
|----------------------------------|--------------------|--------------|-----------------|-------------------|---------------|-----------------|------------|
|                                  |                    | $\rho_G^c$   | $P(\rho_G=0)^d$ | $P( \rho_G =1)^d$ | $\rho_E^c$    | $P(\rho_E=0)^d$ | $\rho_P^f$ |
| M <sup>1</sup> META <sup>E</sup> |                    |              |                 |                   |               |                 |            |
| M <sup>2</sup> META              | 330                | 0.470±0.178* | <b>0.030</b>    | <b>&lt;0.001</b>  | 0.385±0.133   | <b>0.013</b>    | 0.424      |
| M <sup>1</sup> HYPO              | 308/A              | 0.264±0.125* | <b>0.050</b>    | <b>&lt;0.001</b>  | -0.059±0.133  | 0.657           | 0.136      |
| M <sup>2</sup> HYPO              | 330                | 0.009±0.210  | 0.964           | <b>&lt;0.001</b>  | 0.548±0.173   | <b>0.022</b>    | 0.135      |
| M <sup>1</sup> C5                | 308/A, A*S         | 0.027±0.159  | 0.864           | <b>&lt;0.001</b>  | 0.123±0.143   | 0.395           | 0.062      |
| M <sup>2</sup> C5                | 329                | 0.361±0.171* | <b>0.033</b>    | <b>&lt;0.001</b>  | -0.075±0.139  | <b>0.013</b>    | 0.140      |
| M <sup>1</sup> CTRAIT            | 308/A, A*S         | -0.020±0.145 | 0.891           | <b>&lt;0.001</b>  | 0.093±0.119   | 0.441           | 0.030      |
| M <sup>2</sup> CTRAIT            | 330                | 0.215±0.207  | 0.300           | <b>&lt;0.001</b>  | -0.194±0.229  | 0.414           | 0.071      |
| M <sup>1</sup> PARA              | 330                | 0.052±0.139  | 0.708           | <b>&lt;0.001</b>  | -0.079±0.122  | 0.518           | -0.002     |
| M <sub>1</sub> CNO               | 330                | 0.063±0.184  | 0.733           | <b>&lt;0.001</b>  | -0.070±0.124  | 0.574           | -0.007     |
| M <sub>2</sub> CNO               | 328                | 0.019±0.218  | 0.931           | <b>&lt;0.001</b>  | -0.215±0.205  | 0.302           | -0.075     |
| M <sub>1</sub> AFOV              | 314/A, A*S         | -0.071±0.139 | 0.611           | <b>&lt;0.001</b>  | 0.143±0.138   | 0.310           | 0.007      |
| M <sub>1</sub> DWRINK            | 335                | 0.234±0.117* | <b>0.050</b>    | <b>&lt;0.001</b>  | -0.005±0.178  | 0.979           | 0.150      |
| M <sub>1</sub> PSTYLID           | 330/S              | 0.187±0.181  | 0.312           | <b>&lt;0.001</b>  | 0.004±0.127   | 0.974           | 0.093      |
| M <sub>1</sub> C5                | 310/A*S            | 0.020±0.133  | 0.883           | <b>&lt;0.001</b>  | 0.330±0.121   | <b>0.012</b>    | 0.111      |
| M <sub>2</sub> C5                | 328                | 0.195±0.195  | 0.335           | <b>&lt;0.001</b>  | -0.182±0.208  | 0.381           | 0.044      |
| M <sub>1</sub> C6                | 330                | 0.272±0.190  | 0.154           | <b>&lt;0.001</b>  | -0.141±0.121  | 0.251           | 0.047      |
| M <sub>1</sub> C7                | 335/S              | -0.067±0.205 | 0.745           | <b>&lt;0.001</b>  | -0.013±0.127  | 0.918           | -0.037     |
| M <sub>2</sub> C7                | 329                | 0.067±0.355  | 0.848           | <b>0.045</b>      | -0.043±0.165  | 0.796           | -0.003     |
| M <sup>2</sup> META              |                    |              |                 |                   |               |                 |            |
| M <sup>1</sup> HYPO              | 303/A              | 0.160±0.194  | 0.420           | <b>0.001</b>      | 0.309±0.191   | 0.136           | 0.213      |
| M <sup>2</sup> HYPO              | 171                | 0.339±0.161  | 0.061           | <b>&lt;0.001</b>  | 0.130±0.277   | 0.643           | 0.252      |
| M <sup>1</sup> C5                | 294/A, A*S         | 0.210±0.188  | 0.282           | <b>&lt;0.001</b>  | -0.111±0.186  | 0.557           | 0.090      |
| M <sup>2</sup> C5                | 171                | -0.019±0.155 | 0.903           | <b>&lt;0.001</b>  | 0.369±0.250   | 0.195           | 0.031      |
| M <sup>1</sup> CTRAIT            | 306/A, A*S         | 0.230±0.188  | 0.223           | <b>&lt;0.001</b>  | -0.200±0.172  | 0.257           | 0.049      |
| M <sup>2</sup> CTRAIT            | 177                | -0.012±0.199 | 0.952           | <b>&lt;0.001</b>  | 0.384±0.222   | 0.124           | 0.100      |
| M <sup>1</sup> PARA <sup>E</sup> | 316                | 0.427±0.184* | <b>0.022</b>    | <b>0.005</b>      | -0.125±0.193  | 0.521           | 0.198      |

|                                  |            |              |                  |                  |              |              |        |
|----------------------------------|------------|--------------|------------------|------------------|--------------|--------------|--------|
| M <sub>1</sub> CNO               | 303        | 0.269±0.238  | 0.245            | <b>0.005</b>     | -0.070±0.142 | 0.625        | 0.088  |
| M <sub>2</sub> CNO               | 183        | -0.026±0.201 | 0.896            | <b>&lt;0.001</b> | -0.020±0.194 | 0.920        | -0.023 |
| M <sub>1</sub> AFOV <sup>E</sup> | 304/A, A*S | 0.010±0.212  | 0.964            | <b>&lt;0.001</b> | 0.298±0.231  | 0.229        | 0.108  |
| M <sub>1</sub> DWRINK            | 324        | 0.422±0.164* | <b>0.010</b>     | <b>0.030</b>     | -0.541±0.171 | <b>0.038</b> | 0.151  |
| M <sub>1</sub> PSTYLID           | 312/S      | 0.261±0.200  | 0.206            | <b>&lt;0.001</b> | -0.268±0.159 | 0.102        | 0.009  |
| M <sub>1</sub> C5                | 284/A*S    | 0.186±0.136  | 0.187            | <b>&lt;0.001</b> | -0.060±0.160 | 0.709        | 0.107  |
| M <sub>2</sub> C5                | 183        | -0.001±0.186 | 0.997            | <b>&lt;0.001</b> | 0.029±0.185  | 0.876        | 0.011  |
| M <sub>1</sub> C6                | 304        | 0.420±0.276  | 0.112            | <b>0.028</b>     | -0.082±0.142 | 0.564        | 0.136  |
| M <sub>1</sub> C7                | 333/S      | 0.614±0.221* | <b>0.011</b>     | <b>0.042</b>     | -0.305±0.178 | 0.100        | 0.130  |
| M <sub>2</sub> C7 <sup>E</sup>   | 197        | 0.081±0.358  | 0.820            | <b>0.049</b>     | 0.090±0.184  | 0.629        | 0.085  |
| M <sup>1</sup> HYPO              |            |              |                  |                  |              |              |        |
| M <sup>2</sup> HYPO              | 302/A      | 0.515±0.139* | <b>0.001</b>     | <b>&lt;0.001</b> | -0.101±0.296 | 0.735        | 0.404  |
| M <sup>1</sup> C5                | 304/A, A*S | 0.237±0.116* | <b>0.037</b>     | <b>&lt;0.001</b> | -0.118±0.138 | 0.399        | 0.136  |
| M <sup>2</sup> C5                | 302/A      | -0.009±0.151 | 0.951            | <b>&lt;0.001</b> | -0.153±0.386 | 0.699        | -0.021 |
| M <sup>1</sup> CTRAIT            | 307/A, A*S | 0.379±0.093* | <b>&lt;0.001</b> | <b>&lt;0.001</b> | 0.029±0.122  | 0.813        | 0.273  |
| M <sup>2</sup> CTRAIT            | 303/A      | 0.414±0.129* | <b>0.004</b>     | <b>&lt;0.001</b> | 0.110±0.229  | 0.633        | 0.345  |
| M <sup>1</sup> PARA <sup>E</sup> | 308/A      | 0.137±0.103  | 0.186            | <b>&lt;0.001</b> | -0.220±0.120 | 0.078        | 0.038  |
| M <sub>1</sub> CNO               | 305/A      | 0.327±0.141* | <b>0.022</b>     | <b>&lt;0.001</b> | -0.056±0.133 | 0.678        | 0.164  |
| M <sub>2</sub> CNO               | 301/A      | 0.052±0.152  | 0.732            | <b>&lt;0.001</b> | 0.261±0.200  | 0.218        | 0.107  |
| M <sub>1</sub> AFOV <sup>E</sup> | 311/A, A*S | 0.086±0.104  | 0.416            | <b>&lt;0.001</b> | 0.134±0.142  | 0.348        | 0.098  |
| M <sub>1</sub> DWRINK            | 312/A      | 0.141±0.096  | 0.144            | <b>&lt;0.001</b> | -0.021±0.238 | 0.930        | 0.111  |
| M <sub>1</sub> PSTYLID           | 308/A, S   | 0.150±0.135  | 0.261            | <b>&lt;0.001</b> | 0.061±0.139  | 0.659        | 0.116  |
| M <sub>1</sub> C5                | 305/A, A*S | 0.292±0.087* | <b>0.002</b>     | <b>&lt;0.001</b> | -0.054±0.134 | 0.692        | 0.218  |
| M <sub>2</sub> C5                | 301/A      | 0.175±0.142  | 0.224            | <b>&lt;0.001</b> | 0.182±0.199  | 0.373        | 0.177  |
| M <sub>1</sub> C6                | 306/A      | 0.254±0.147  | 0.080            | <b>&lt;0.001</b> | -0.052±0.133 | 0.697        | 0.122  |
| M <sub>1</sub> C7                | 312/A, S   | 0.273±0.156  | 0.080            | <b>0.001</b>     | -0.121±0.132 | 0.369        | 0.096  |
| M <sub>2</sub> C7 <sup>E</sup>   | 301/A      | 0.232±0.276  | 0.413            | <b>0.048</b>     | -0.075±0.225 | 0.741        | 0.073  |
| H <sup>2</sup> HYPO              |            |              |                  |                  |              |              |        |
| M <sup>1</sup> C5                | 293/A, A*S | 0.474±0.116* | <b>0.001</b>     | <b>&lt;0.001</b> | 0.214±0.188  | 0.270        | 0.425  |
| M <sup>2</sup> C5                | 131        | 0.106±0.112  | 0.346            | <b>&lt;0.001</b> | -0.053±0.332 | 0.873        | 0.098  |
| M <sup>1</sup> CTRAIT            | 304/A, A*S | 0.504±0.134* | <b>0.003</b>     | <b>&lt;0.001</b> | 0.145±0.422  | 0.736        | 0.418  |

|                                  |            |              |        |        |              |       |        |
|----------------------------------|------------|--------------|--------|--------|--------------|-------|--------|
| M <sup>2</sup> CTRAIT            | 161        | 0.463±0.112* | <0.001 | <0.001 | -0.254±0.262 | 0.362 | 0.377  |
| M <sup>1</sup> PARA <sup>E</sup> | 315        | 0.218±0.117  | 0.079  | <0.001 | 0.108±0.225  | 0.635 | 0.195  |
| M <sub>1</sub> CNO               | 303        | 0.375±0.158* | 0.030  | <0.001 | -0.415±0.274 | 0.209 | 0.186  |
| M <sub>2</sub> CNO               | 160        | 0.266±0.158  | 0.077  | 0.001  | -0.228±0.249 | 0.379 | 0.170  |
| M <sub>1</sub> AFOV <sup>E</sup> | 302/A, A*S | -0.198±0.186 | 0.291  | <0.001 | 0.580±0.312  | 0.222 | -0.080 |
| M <sub>1</sub> DWRINK            | 321        | 0.348±0.111* | 0.003  | <0.001 | -0.552±0.194 | 0.045 | 0.277  |
| M <sub>1</sub> PSTYLID           | 310/S      | 0.367±0.146* | 0.023  | <0.001 | 0.040±0.216  | 0.853 | 0.265  |
| M <sub>1</sub> C5                | 284/A*S    | 0.397±0.123* | 0.005  | <0.001 | 0.111±0.197  | 0.575 | 0.363  |
| M <sub>2</sub> C5                | 162        | 0.389±0.131* | 0.003  | <0.001 | -0.211±0.220 | 0.375 | 0.271  |
| M <sub>1</sub> C6                | 304        | 0.314±0.164  | 0.070  | <0.001 | -0.453±0.207 | 0.079 | 0.129  |
| M <sub>1</sub> C7                | 333/S      | 0.338±0.168* | 0.028  | 0.001  | -0.470±0.215 | 0.086 | 0.159  |
| M <sub>2</sub> C7 <sup>E</sup>   | 190        | -0.006±0.236 | 0.979  | 0.037  | -0.043±0.308 | 0.888 | -0.013 |
| M <sup>1</sup> C5                |            |              |        |        |              |       |        |
| M <sup>2</sup> C5                | 293/A, A*S | 0.196±0.137  | 0.158  | <0.001 | -0.025±0.240 | 0.917 | 0.168  |
| M <sup>1</sup> CTRAIT            | 307/A, A*S | 0.390±0.108* | 0.001  | <0.001 | -0.009±0.135 | 0.947 | 0.268  |
| M <sup>2</sup> CTRAIT            | 293/A, A*S | 0.438±0.126* | 0.002  | <0.001 | -0.086±0.193 | 0.660 | 0.325  |
| M <sup>1</sup> PARA <sup>E</sup> | 306/A, A*S | 0.088±0.109  | 0.429  | <0.001 | 0.231±0.131  | 0.089 | 0.127  |
| M <sub>1</sub> CNO               | 304/A, A*S | 0.324±0.145* | 0.037  | <0.001 | 0.004±0.142  | 0.978 | 0.193  |
| M <sub>2</sub> CNO               | 293/A, A*S | 0.334±0.158* | 0.036  | <0.001 | -0.090±0.180 | 0.618 | 0.219  |
| M <sub>1</sub> AFOV <sup>E</sup> | 312/A, A*S | 0.143±0.119  | 0.223  | <0.001 | -0.310±0.157 | 0.071 | 0.031  |
| M <sub>1</sub> DWRINK            | 314/A, A*S | 0.384±0.105* | <0.001 | <0.001 | -0.562±0.162 | 0.023 | 0.217  |
| M <sub>1</sub> PSTYLID           | 306/ALL    | 0.377±0.132* | 0.009  | <0.001 | 0.104±0.144  | 0.470 | 0.274  |
| M <sub>1</sub> C5                | 303/A, A*S | 0.121±0.096  | 0.215  | <0.001 | 0.216±0.139  | 0.133 | 0.139  |
| M <sub>2</sub> C5                | 293/A, A*S | 0.456±0.142* | 0.002  | <0.001 | -0.143±0.169 | 0.406 | 0.292  |
| M <sub>1</sub> C6                | 303/A, A*S | 0.285±0.151  | 0.068  | <0.001 | 0.024±0.140  | 0.865 | 0.175  |
| M <sub>1</sub> C7                | 314/ALL    | 0.300±0.167  | 0.112  | <0.001 | 0.076±0.174  | 0.664 | 0.199  |
| M <sub>2</sub> C7 <sup>E</sup>   | 294/ALL    | -0.085±0.269 | 0.753  | 0.046  | 0.166±0.205  | 0.421 | 0.029  |
| M <sup>2</sup> C5                |            |              |        |        |              |       |        |
| M <sup>1</sup> CTRAIT            | 304/A, A*S | 0.153±0.158  | 0.328  | <0.001 | -0.243±0.428 | 0.590 | 0.096  |
| M <sup>2</sup> CTRAIT            | 163        | 0.100±0.111  | 0.374  | <0.001 | 0.433±0.239  | 0.132 | 0.119  |
| M <sup>1</sup> PARA <sup>E</sup> | 314        | 0.081±0.117  | 0.488  | <0.001 | -0.059±0.235 | 0.803 | 0.063  |

|                                  |            |              |              |              |              |              |        |
|----------------------------------|------------|--------------|--------------|--------------|--------------|--------------|--------|
| M <sub>1</sub> CNO               | 302        | 0.189±0.176  | 0.276        | <0.001       | -0.224±0.430 | 0.621        | 0.103  |
| M <sub>2</sub> CNO               | 162        | -0.158±0.122 | 0.202        | <0.001       | 0.599±0.171  | <b>0.018</b> | -0.086 |
| M <sub>1</sub> AFOV <sup>E</sup> | 302/A, A*S | -0.185±0.160 | 0.259        | <0.001       | 0.020±0.437  | 0.964        | 0.159  |
| M <sub>1</sub> DWRINK            | 321        | 0.099±0.110  | 0.374        | <0.001       | -0.030±0.304 | 0.922        | 0.092  |
| M <sub>1</sub> PSTYLID           | 310/S      | 0.352±0.160* | <b>0.026</b> | <0.001       | -0.915±0.040 | <0.001       | 0.156  |
| M <sub>1</sub> C5                | 283/A*S    | -0.086±0.120 | 0.478        | <0.001       | 0.084±0.362  | 0.818        | -0.073 |
| M <sub>2</sub> C5                | 165        | -0.110±0.121 | 0.365        | <0.001       | 0.949±0.026  | <0.001       | -0.030 |
| M <sub>1</sub> C6                | 303        | 0.302±0.170  | 0.077        | <0.001       | -0.141±0.301 | 0.646        | 0.181  |
| M <sub>1</sub> C7                | 333/S      | -0.071±0.184 | 0.698        | <0.001       | 0.014±0.296  | 0.963        | -0.043 |
| M <sub>2</sub> C7 <sup>E</sup>   | 189        | 0.017±0.233  | 0.942        | <b>0.040</b> | -0.092±0.445 | 0.838        | -0.004 |
| M <sup>1</sup> CTRAIT            |            |              |              |              |              |              |        |
| M <sup>2</sup> CTRAIT            | 306/A, A*S | 0.769±0.106* | <0.001       | <b>0.011</b> | -0.308±0.177 | 0.115        | 0.482  |
| M <sup>1</sup> PARA <sup>E</sup> | 309/A, A*S | 0.110±0.110  | 0.323        | <0.001       | 0.047±0.122  | 0.702        | 0.089  |
| M <sub>1</sub> CNO               | 309/A, A*S | 0.019±0.151  | 0.903        | <0.001       | 0.159±0.129  | 0.224        | 0.079  |
| M <sub>2</sub> CNO               | 305/A, A*S | 0.123±0.155  | 0.430        | <0.001       | 0.279±0.182  | 0.149        | 0.168  |
| M <sub>1</sub> AFOV <sup>E</sup> | 314/A, A*S | 0.114±0.109  | 0.307        | <0.001       | 0.039±0.141  | 0.779        | 0.092  |
| M <sub>1</sub> DWRINK            | 315/A, A*S | 0.143±0.110  | 0.198        | <0.001       | -0.144±0.292 | 0.639        | 0.086  |
| M <sub>1</sub> PSTYLID           | 309/ALL    | 0.350±0.134* | <b>0.010</b> | <0.001       | -0.113±0.121 | 0.356        | 0.160  |
| M <sub>1</sub> C5                | 308/A, A*S | 0.160±0.097  | 0.105        | <0.001       | 0.035±0.132  | 0.790        | 0.127  |
| M <sub>2</sub> C5                | 305/A, A*S | 0.259±0.148  | 0.089        | <0.001       | 0.084±0.184  | 0.648        | 0.205  |
| M <sub>1</sub> C6                | 309/A, A*S | 0.037±0.149  | 0.806        | <0.001       | 0.185±0.123  | 0.140        | 0.100  |
| M <sub>1</sub> C7                | 314/ALL    | 0.055±0.162  | 0.737        | <0.001       | 0.126±0.125  | 0.319        | 0.086  |
| M <sub>2</sub> C7 <sup>E</sup>   | 304/A, A*S | -0.118±0.274 | 0.665        | <b>0.050</b> | 0.087±0.185  | 0.639        | -0.007 |
| M <sup>2</sup> CTRAIT            |            |              |              |              |              |              |        |
| M <sup>1</sup> PARA <sup>E</sup> | 316        | 0.324±0.127* | <b>0.013</b> | <0.001       | -0.321±0.192 | 0.135        | 0.182  |
| M <sub>1</sub> CNO               | 305        | 0.364±0.152* | <b>0.021</b> | <0.001       | -0.137±0.159 | 0.398        | 0.197  |
| M <sub>2</sub> CNO               | 173        | 0.204±0.145  | 0.188        | <0.001       | 0.252±0.185  | 0.192        | 0.212  |
| M <sub>1</sub> AFOV <sup>E</sup> | 303/A, A*S | -0.068±0.189 | 0.715        | <0.001       | 0.492±0.224  | 0.098        | 0.061  |
| M <sub>1</sub> DWRINK            | 323        | 0.213±0.122  | 0.083        | <0.001       | -0.333±0.287 | 0.317        | 0.147  |
| M <sub>1</sub> PSTYLID           | 310/S      | 0.534±0.148* | <b>0.001</b> | <b>0.001</b> | -0.360±0.174 | 0.070        | 0.270  |
| M <sub>1</sub> C5                | 285/A*S    | 0.268±0.111* | <b>0.020</b> | <0.001       | 0.016±0.182  | 0.930        | 0.225  |

|                                  |            |               |        |        |              |        |        |
|----------------------------------|------------|---------------|--------|--------|--------------|--------|--------|
| M <sub>2</sub> C5                | 174        | 0.235±0.132   | 0.096  | <0.001 | 0.277±0.175  | 0.133  | 0.242  |
| M <sub>1</sub> C6                | 306        | 0.258±0.171   | 0.146  | <0.001 | -0.043±0.161 | 0.789  | 0.148  |
| M <sub>1</sub> C7                | 335/S      | 0.432±0.195*  | 0.037  | 0.002  | -0.312±0.209 | 0.181  | 0.166  |
| M <sub>2</sub> C7 <sup>E</sup>   | 194        | -0.015±0.280  | 0.958  | 0.038  | 0.028±0.274  | 0.920  | 0.002  |
| M <sup>I</sup> PARA <sup>E</sup> |            |               |        |        |              |        |        |
| M <sub>1</sub> CNO               | 326        | 0.263±0.131*  | 0.046  | <0.001 | -0.050±0.124 | 0.687  | 0.137  |
| M <sub>2</sub> CNO               | 315        | 0.115±0.155   | 0.456  | <0.001 | -0.131±0.190 | 0.500  | 0.043  |
| M <sup>I</sup> AFOV <sup>E</sup> | 313/A, A*S | 0.063±0.104   | 0.546  | <0.001 | -0.128±0.132 | 0.338  | 0.015  |
| M <sup>I</sup> DWRINK            | 337        | 0.094±0.089   | 0.290  | <0.001 | -0.048±0.148 | 0.746  | 0.069  |
| M <sub>1</sub> PSTYLID           | 325/S      | 0.565±0.146*  | <0.001 | 0.004  | -0.317±0.138 | 0.039  | 0.215  |
| M <sub>1</sub> C5                | 305/A*S    | -0.028±0.094  | 0.764  | <0.001 | 0.148±0.129  | 0.260  | 0.009  |
| M <sub>2</sub> C5                | 315        | 0.087±0.140   | 0.534  | <0.001 | -0.097±0.182 | 0.599  | 0.034  |
| M <sub>1</sub> C6                | 326        | 0.259±0.133   | 0.055  | <0.001 | -0.023±0.123 | 0.852  | 0.140  |
| M <sub>1</sub> C7                | 336/S      | 0.286±0.152   | 0.061  | <0.001 | 0.001±0.131  | 0.993  | 0.153  |
| M <sub>2</sub> C7                | 316        | 0.769±0.248** | 0.002  | 0.210  | -0.270±0.177 | 0.160  | 0.227  |
| M <sub>1</sub> CNO               |            |               |        |        |              |        |        |
| M <sub>2</sub> CNO               | 300        | 0.124±0.188   | 0.511  | <0.001 | -0.047±0.159 | 0.770  | 0.055  |
| M <sub>1</sub> AFOV <sup>E</sup> | 309/A*S    | 0.052±0.146   | 0.720  | <0.001 | -0.184±0.132 | 0.175  | -0.033 |
| M <sup>I</sup> DWRINK            | 324        | 0.211±0.154   | 0.217  | <0.001 | -0.468±0.211 | 0.221  | 0.031  |
| M <sub>1</sub> PSTYLID           | 320/S      | 0.261±0.195   | 0.173  | 0.001  | -0.061±0.133 | 0.651  | 0.097  |
| M <sub>1</sub> C5                | 284/A*S    | 0.166±0.127   | 0.194  | <0.001 | 0.048±0.143  | 0.736  | 0.117  |
| M <sub>2</sub> C5                | 300        | 0.037±0.179   | 0.835  | <0.001 | -0.015±0.156 | 0.924  | 0.016  |
| M <sub>1</sub> C6                | 296        | 0.818±0.058*  | <0.001 | <0.001 | 0.857±0.034  | <0.001 | 0.838  |
| M <sub>1</sub> C7                | 330/S      | 0.091±0.219   | 0.676  | <0.001 | -0.072±0.141 | 0.612  | 0.002  |
| M <sub>2</sub> C7 <sup>E</sup>   | 304        | 0.607±0.434   | 0.088  | 0.248  | -0.043±0.133 | 0.745  | 0.161  |
| M <sub>2</sub> CNO               |            |               |        |        |              |        |        |
| M <sub>1</sub> AFOV <sup>E</sup> | 300/A, A*S | 0.234±0.154   | 0.148  | <0.001 | 0.258±0.253  | 0.336  | 0.240  |
| M <sub>1</sub> DWRINK            | 318        | 0.383±0.136*  | 0.007  | <0.001 | -0.065±0.375 | 0.864  | 0.295  |
| M <sub>1</sub> PSTYLID           | 306/S      | 0.241±0.182   | 0.205  | <0.001 | -0.206±0.191 | 0.295  | 0.079  |
| M <sub>1</sub> C5                | 283/A*S    | 0.298±0.129*  | 0.025  | <0.001 | -0.048±0.174 | 0.782  | 0.224  |
| M <sub>2</sub> C5                | 145        | 0.963±0.021*  | <0.001 | 0.028  | 0.797±0.061  | <0.001 | 0.911  |

|                      |            |               |              |                  |              |                  |        |
|----------------------|------------|---------------|--------------|------------------|--------------|------------------|--------|
| M1 C6                | 300        | -0.052±0.195  | 0.791        | <b>&lt;0.001</b> | -0.011±0.159 | 0.943            | -0.034 |
| M1 C7                | 322/S      | 0.115±0.217   | 0.597        | <b>&lt;0.001</b> | -0.180±0.199 | 0.373            | -0.012 |
| M2 C7 <sup>E</sup>   | 187        | -0.292±0.273  | 0.279        | 0.055            | 0.241±0.211  | 0.270            | -0.024 |
| M1 AFOV <sup>E</sup> |            |               |              |                  |              |                  |        |
| M1 DWRINK            | 302/A*S    | 0.258±0.079*  | <b>0.002</b> | <b>&lt;0.001</b> | 0.042±0.141  | 0.766            | 0.224  |
| M1 PSTYLID           | 312/ALL    | 0.053±0.136   | 0.698        | <b>&lt;0.001</b> | 0.135±0.150  | 0.374            | 0.078  |
| M1 C5                | 308/A, A*S | 0.092±0.095   | 0.338        | <b>&lt;0.001</b> | 0.033±0.135  | 0.807            | 0.081  |
| M2 C5                | 301/A, A*S | 0.163±0.152   | 0.292        | <b>&lt;0.001</b> | 0.220±0.240  | 0.381            | 0.177  |
| M1 C6                | 309/A, A*S | 0.091±0.146   | 0.529        | <b>&lt;0.001</b> | -0.222±0.128 | 0.096            | -0.023 |
| M1 C7                | 312/ALL    | -0.019±0.154  | 0.900        | <b>&lt;0.001</b> | -0.013±0.147 | 0.929            | -0.016 |
| M2 C7                | 303/A, A*S | 0.358±0.341   | 0.317        | 0.088            | -0.300±0.286 | 0.375            | 0.042  |
| M1 DWRINK            |            |               |              |                  |              |                  |        |
| M1 PSTYLID           | 325/S      | 0.049±0.129   | 0.707        | <b>&lt;0.001</b> | 0.246±0.196  | 0.247            | 0.083  |
| M1 C5                | 308/A*S    | -0.116±0.088  | 0.187        | <b>&lt;0.001</b> | 0.010±0.256  | 0.967            | -0.101 |
| M2 C5                | 320        | 0.236±0.125   | 0.070        | <b>&lt;0.001</b> | 0.308±0.254  | 0.285            | 0.236  |
| M1 C6                | 325        | 0.354±0.169   | 0.062        | <b>0.004</b>     | -0.469±0.199 | 0.164            | 0.099  |
| M1 C7                | 331/S      | -0.115±0.129  | 0.356        | <b>&lt;0.001</b> | 0.680±0.086  | <b>&lt;0.001</b> | 0.086  |
| M2 C7 <sup>E</sup>   | 325        | 0.150±0.279   | 0.617        | 0.055            | -0.191±0.456 | 0.716            | 0.032  |
| M1 PSTYLID           |            |               |              |                  |              |                  |        |
| M1 C5                | 302/S, A*S | 0.190±0.130   | 0.136        | <b>&lt;0.001</b> | -0.252±0.138 | 0.085            | 0.057  |
| M2 C5                | 307/S      | 0.396±0.151*  | <b>0.016</b> | <b>&lt;0.001</b> | -0.327±0.184 | 0.100            | 0.150  |
| M1 C6                | 320/S      | 0.088±0.195   | 0.650        | <b>&lt;0.001</b> | 0.076±0.134  | 0.572            | 0.082  |
| M1 C7                | 331/S      | 0.350±0.228   | 0.121        | <b>0.005</b>     | -0.067±0.134 | 0.619            | 0.114  |
| M2 C7 <sup>E</sup>   | 313/S      | 0.849±0.262** | <b>0.003</b> | 0.290            | -0.097±0.140 | 0.491            | 0.270  |
| M1 C5                |            |               |              |                  |              |                  |        |
| M2 C5                | 283/A*S    | 0.434±0.114*  | <b>0.001</b> | <b>&lt;0.001</b> | -0.033±0.169 | 0.843            | 0.335  |
| M1 C6                | 283/A*S    | -0.272±0.123* | <b>0.035</b> | <b>&lt;0.001</b> | -0.107±0.141 | 0.449            | -0.200 |
| M1 C7                | 311/S, A*S | -0.006±0.151  | 0.966        | <b>&lt;0.001</b> | 0.020±0.184  | 0.912            | 0.002  |
| M2 C7 <sup>E</sup>   | 283/A*S    | -0.040±0.214  | 0.852        | 0.055            | 0.040±0.184  | 0.828            | -0.006 |
| M2 C5                |            |               |              |                  |              |                  |        |
| M1 C6                | 300        | -0.135±0.187  | 0.470        | <b>&lt;0.001</b> | 0.028±0.156  | 0.855            | -0.064 |

|                                |       |               |              |                  |              |       |        |
|--------------------------------|-------|---------------|--------------|------------------|--------------|-------|--------|
| M <sub>1</sub> C7              | 332/S | 0.121±0.196   | 0.537        | <b>&lt;0.001</b> | -0.097±0.182 | 0.594 | 0.024  |
| M <sub>2</sub> C7 <sup>E</sup> | 188   | -0.016±0.247  | 0.948        | <b>0.039</b>     | -0.027±0.205 | 0.895 | -0.020 |
| M <sub>1</sub> C6              |       |               |              |                  |              |       |        |
| M <sub>1</sub> C7              | 330/S | 0.067±0.227   | 0.767        | <b>&lt;0.001</b> | -0.005±0.140 | 0.969 | 0.026  |
| M <sub>2</sub> C7 <sup>E</sup> | 304   | 0.730±0.502   | 0.064        | 0.324            | -0.085±0.129 | 0.516 | 0.152  |
| M <sub>1</sub> C7              |       |               |              |                  |              |       |        |
| M <sub>2</sub> C7 <sup>E</sup> | 332/S | 0.856±0.345** | <b>0.020</b> | 0.344            | -0.206±0.163 | 0.211 | 0.152  |

<sup>a</sup>M=molar. Maxillary and mandibular traits indicated by superscript and subscript, respectively. All traits represented by their maximum antimeric expression score. For a list of morphological trait abbreviations, see Table 1. “E” superscript indicates a trait that was originally flagged for intra-observer error because the error range exceeded a single grade, but whose mean error does not exceed 0.300. Traits with mean error exceeding 0.300 were omitted from the correlation analyses. All third molar traits were omitted from the correlation analyses due to sample size limitations. All models involving M<sup>2</sup> paracone, M<sub>2</sub> cusp 6, and M<sub>1</sub>/M<sub>2</sub> distal trigonid crest either failed to converge or yielded suspect results due to standard deviation ranges for parameter estimates and are excluded from the table. These traits are omitted from Figure 2 and all summary statistics. Results for these models can be found in the supplemental files of Paul (2017).

<sup>b</sup>Covariates fixed in the genetic correlation models based on univariate model results (see Paul et al., 2020). “A”=age; “S”=sex; “A\*S”=age/sex interaction; “ALL”=all covariates.

<sup>c</sup>Maximum-likelihood estimate of genetic correlation. Cases of incomplete pleiotropy indicated by a single asterisk. Cases of complete pleiotropy indicated by two asterisks. Dashes are associated with incalculable parameter estimates.

<sup>d</sup>Probability of hypothesis (as indicated in parentheses) given pedigree structure with values p<0.050 bolded. Dashes are associated with incalculable parameter estimates.

<sup>e</sup>Maximum-likelihood estimate of environmental correlation. Dashes are associated with incalculable parameter estimates.

<sup>f</sup>Maximum-likelihood estimate of derived phenotypic correlation. Dashes are associated with incalculable parameter estimates.
